# Supplementary material for: Graphene oxide–palladium modified Ag–AgBr: a visible-light-responsive photocatalyst for the Suzuki coupling reaction
Source: Royal Society of Chemistry journal article supplement (doi:10.1039/c4ra05988c), 2014-01-01
Supplement: c4ra05988c1.pdf [file c4ra05988c1.pdf]

## Supporting Information

### **Graphene Oxide-Palladium Modified Ag-AgBr: A Novel Visible-Light-Responsive Photocatalyst for the Suzuki Coupling Reaction\*\***

*Shutao Gao, Ningzhao Shang, Cheng Feng, Chun Wang\*, Zhi Wang*

# Table of Contents

## Experimental Details

**Figure S1.** XRD patterns of (a) Ag-AgBr, (b) AgBr, and (c) GO-Pd@Ag-AgBr.

**Figure S2** XPS peaks of (a) Ag 3d, (b) Br 3d, (c) Pd 3d and (d) C 1s for GO-Pd@Ag-AgBr.

**Figure S3.** EDX elemental analysis of the as-synthesized GO-Pd@Ag-AgBr. The quantitative elemental analysis results are also listed in the inserted panel.

**Figure S4.** Schematic diagram illuminating the possible photocatalytic mechanism of GO-Pd@Ag-AgBr composite photocatalyst.

**Figure S5.** XRD patterns of the used GO-Pd@Ag-AgBr

**Table S1.** Screening and control experiments for Suzuki coupling of bromobenzene and benzenboronic acid. <sup>[a]</sup>

## Experimental Details

**Materials:** Graphite powder (320 mesh), silver nitrate ( $\text{AgNO}_3$ ), triethanolamine (TEA), dimethyl formamide (DMF), sodium bromide (NaBr), glycerol, polyvinylpyrrolidone (PVP, K-30, MW 40 000), potassium carbonate ( $\text{K}_2\text{CO}_3$ ), and ethanol was provided by the Boaixin Co., Ltd. (Baoding, China). Arylboronic acids, aryl halides, and palladium chloride ( $\text{PdCl}_2$ ) were purchased from Aladdin Reagent Limited Company and used as received.

**Characterization:** The size and morphology of the catalyst were observed by scanning electron microscopy (SEM) using a Hitachi S4800 field emission electron microscope operated at 30 kV. The energy dispersive X-ray spectroscopy (EDX) was measured with a Horiba EMAX X-act energy dispersive spectroscopy that was attached to the Hitachi S-4800 system. The XRD patterns of the samples were recorded with a Rigaku D/max 2500 X-ray diffractometer using  $\text{Cu K}\alpha$  radiation (40 kV, 150 mA) in the range  $2\theta = 10^\circ$ – $80^\circ$ . The Pd content was determined by means of inductively coupled plasma atomic emission spectroscopy (ICP-AES) on Thermo Elemental IRIS Intrepid II. X-ray photoelectron spectroscopy (XPS) was performed with a PHI 1600 spectroscope using  $\text{Mg K}\alpha$  X-ray source for excitation. The diffuse reflectance spectra (DRS) were measured by a UV–vis spectrometer (UV-3600, Shimadzu) in the range of 300–800 nm.  $\text{BaSO}_4$  was used as the reflectance standard material. The concentrations Pd and Ag were determined by means of inductively coupled plasma atomic emission spectroscopy (ICP-AES) on Thermo Elemental IRIS Intrepid II.

**Synthesis of the photocatalysts:** Ag-AgBr nanoparticles were fabricated according to the reference method with some modification<sup>S1</sup>. Typically, 39 mg NaBr and 108 mg PVP were added into 15 mL glycerol in a 50 mL flask at 60 °C under stirring. After PVP and NaBr were completely dissolved, 1 mL of glycerol solution of  $\text{AgNO}_3$  ( $52 \text{ mg mL}^{-1}$ ) was injected dropwise to the above solution and stirred for 20 min. Then the mixture was heated to 80 °C and maintained at that temperature for 40 min. Then the flask was placed in 200 °C oil bath and incubated at that temperature for 20 min. The product was rinsed with de-ionized water several times to remove PVP and excess external ions. Without the high-temperature incubation process at 200 °C, the obtained sample was denoted as AgBr.

GO was prepared according to the procedure reported by us<sup>S2</sup>. 0.4 mL of  $1 \text{ mg mL}^{-1}$   $\text{PdCl}_2$  solution was added into 2 mL of  $1 \text{ mg mL}^{-1}$  GO aqueous dispersion and the mixture was stirred overnight. The as-obtained AgBr nanosheets were dispersed in 8 mL of de-ionized water and then the above GO-Pd solution was added. The mixture was stirred vigorously for 1 h so as to make the GO sheets encase the AgBr evenly. Finally the suspension was dried in a vacuum at 80 °C for 2 h, and the obtained sample was denoted as GO-Pd@Ag-AgBr. Without light irradiated reduction, the sample was denoted as GO-Pd@AgBr. For comparison, Pd@Ag-AgBr was fabricated according to the same procedure for GO-Pd@Ag-AgBr except that 2 mL of the GO aqueous dispersion was replaced by 2 mL of water. GO-Pd sample was obtained by evaporation of GO-Pd aqueous dispersion under vacuum at 80 °C for 2 h.

The concentration of palladium in GO-Pd@Ag-AgBr was 0.5 wt%, which was determined by ICP-AES.

**Catalytic Evaluation:** In a typical reaction, 2 mL of water, 2 mL of ethanol, 0.5 mmol of aryl halide, 0.60 mmol of aryl boronic acid, 1.5 mmol of potassium carbonate and 25 mg of GO-Pd<sup>2+</sup>@Ag-AgBr were mixed in a 25 mL round bottom flask and sonicated for 2 minutes to get a homogeneous dispersion. The light irradiation was performed with a HSX-F/UV 300 Xe lamp (Beijing NBET Technology Co., Ltd). The mixture was irradiated with a 300W Xe lamp (focused through a shutter window) equipped with a water filter and an ultraviolet cutoff filter to provide visible light with  $>400 \text{ nm}$  for 1 h under magnetic stir. The distance between the lamp and sample were 25 cm. The temperature of the reactant solution was maintained at 25°C by a water bath during the reaction. Upon the completion of the reaction (monitored by thin layer chromatography), the reaction mixture was diluted with 20 mL  $\text{H}_2\text{O}$  and extracted with ether ( $3 \times 10 \text{ mL}$ ). The organic phase were combined together and dried over anhydrous  $\text{MgSO}_4$ . The solvent was evaporated under vacuum. The pure products were obtained by flash chromatography using petroleum ether-ethyl acetate as the eluent.

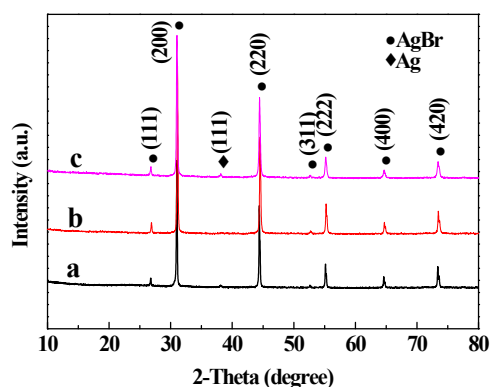

**Figure S1.** XRD patterns of (a) Ag-AgBr, (b) AgBr, and (c) GO-Pd@Ag-AgBr.

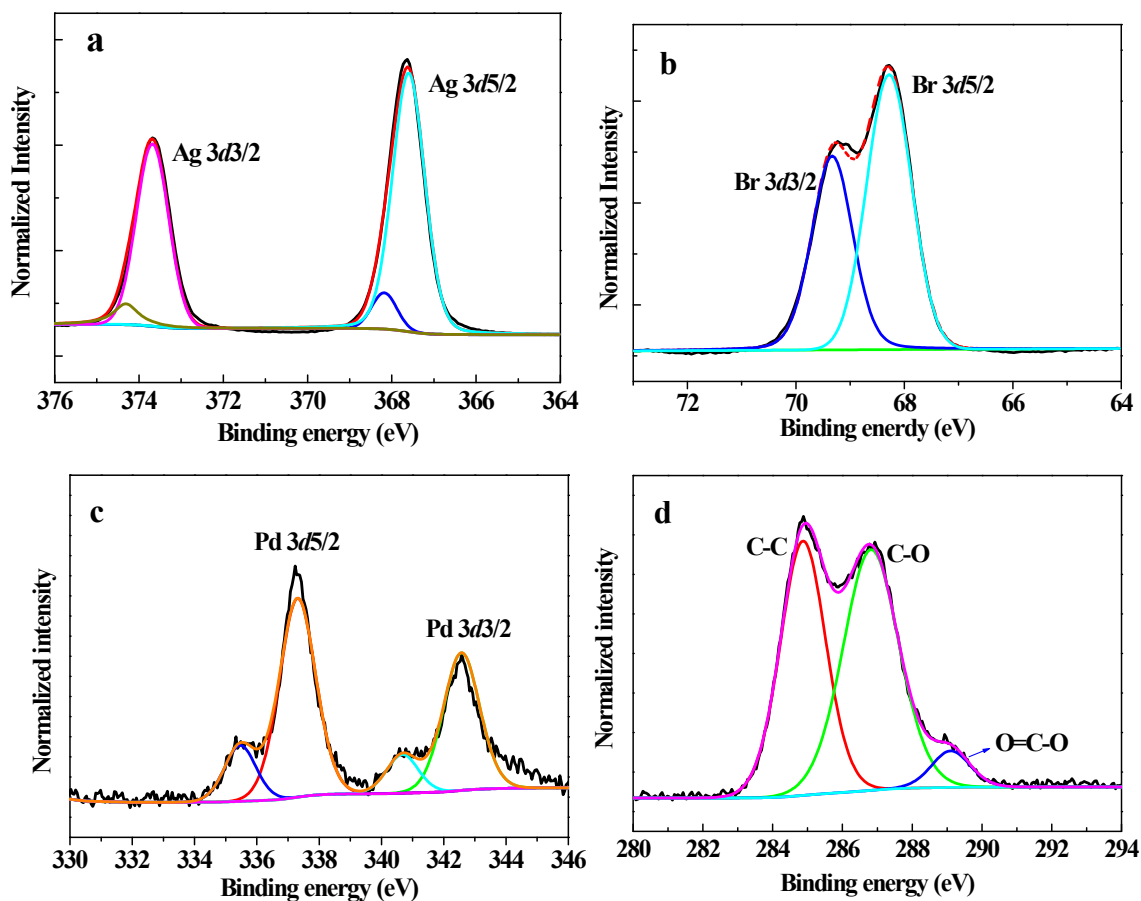

Figure S2. XPS peaks of (a) Ag 3d, (b) Br 3d, (c) Pd 3d and (d) C 1s for GO-Pd@Ag-AgBr.

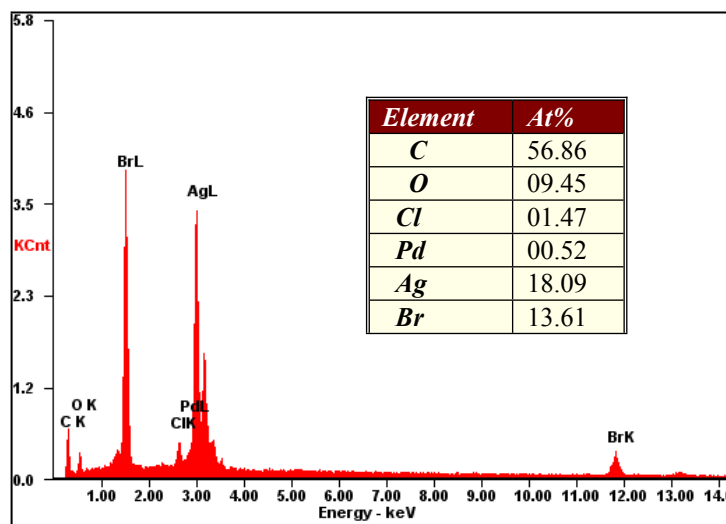

Figure S3 EDX elemental analysis of the as-synthesized GO-Pd@Ag-AgBr. The quantitative elemental analysis results are also listed in the inserted panel.

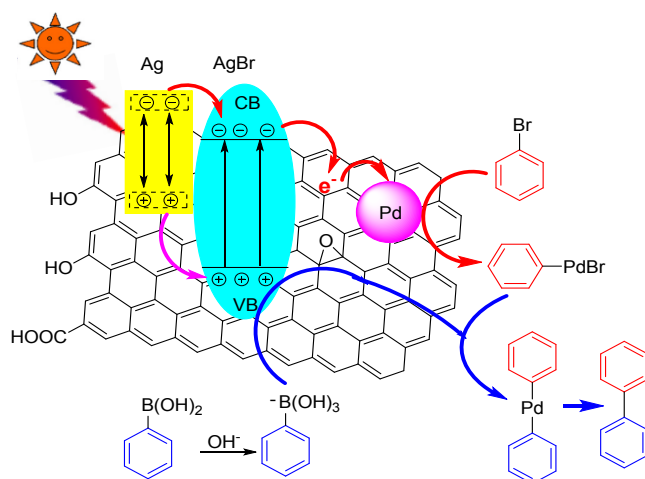

**Figure S4.** Schematic diagram illustrating the possible photocatalytic mechanism of GO-Pd@Ag-AgBr composite photocatalyst.

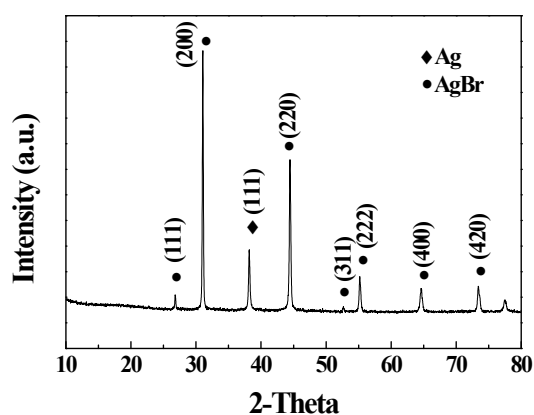

**Figure S5.** XRD patterns of the used GO-Pd@Ag-AgBr

**Table S1.** Screening and control experiments for Suzuki coupling of bromobenzene and benzenboronic acid<sup>[a]</sup>

| Entry | Catalyst        | Other changed parameters     | hν       | Yields (%)        |
|-------|-----------------|------------------------------|----------|-------------------|
| 1     | GO- Pd @Ag-AgBr | -                            | +        | 99                |
| 2     | GO- Pd @Ag-AgBr | -                            | -        | 9                 |
| 3     | GO- Pd @Ag-AgBr | -                            | UV-light | 99 <sup>[b]</sup> |
| 4     | Ag-AgBr         | -                            | +        | 0                 |
| 5     | GO- Pd          | -                            | +        | 0                 |
| 6     | GO- Pd @Ag      | -                            | +        | 8                 |
| 7     | Pd @Ag-AgBr     | -                            | +        | 88                |
| 8     | GO- Pd @Ag-AgBr | adding 0.5 mL TEA            | +        | 0                 |
| 9     | GO- Pd @Ag-AgBr | adding 0.5 mL TEA, 80 °C, 2h | -        | 83                |
| 10    | GO- Pd @Ag-AgBr | without N <sub>2</sub>       | +        | 87                |

[a] Reaction conditions: 2 mL of water, 2 mL of ethanol, 1.5 mmol K<sub>2</sub>CO<sub>3</sub>, 0.6 mmol benzenboronic acid, 0.5 mmol bromobenzene, 25 mg of catalyst, N<sub>2</sub> atmosphere, 300 W Xe lamp with UV cutoff filter (providing visible light with >400 nm), 25 °C, 1 h. [b] reaction time 30 min.

## Reference

- [S1] J. Wang, C. An, J. Liu, G. Xi, W. Jiang, S. Wang, Q.H. Zhang, *J. Mat. Chem. A* **2013**, *1*, 2827-2832.  
 [S2] C. Wang, C. Feng, Y. Gao, X. Ma, Q. Wu, Z. Wang, *Chem. Eng. J.* **2011**, *173*, 92-97.
